# Supplementary material
Source: PubMed Central journal article supplement (PMC6332448)
Supplement: id8b00246_si_001.pdf [file id8b00246_si_001.pdf]

## **SUPPLEMENTARY INFORMATION FOR:-**

### **SAR studies leading to the identification of a novel series of metallo- $\beta$ -lactamase inhibitors for the treatment of carbapenem-resistant Enterobacteriaceae infections that display efficacy in an animal infection model**

Simon Leiris<sup>1</sup>, Alicia Coelho<sup>1</sup>, Jérôme Castandet<sup>1</sup>, Maëlle Bayet<sup>1</sup>, Clarisse Lozano<sup>1</sup>, Juliette Bougnon<sup>1</sup>, Justine Bousquet<sup>1</sup>, Martin Everett<sup>1</sup>, Marc Lemonnier<sup>1</sup>, Nicolas Sprynski<sup>1</sup>, Magdalena Zalacain<sup>1,2</sup>, T. David Pallin<sup>3</sup>, Michael C. Cramp<sup>3</sup>, Neil Jennings<sup>3</sup>, Gilles Raphy<sup>3</sup>, Mark W. Jones<sup>3</sup>, Ramesh Pattipati<sup>4</sup>, Battu Shankar<sup>4</sup>, Relangi Sivasubrahmanyam<sup>4</sup>, Ashok K. Soodhagani<sup>4</sup>, Ramakrishna R. Juventhala<sup>4</sup>, Narender Pottabathini<sup>4,5</sup>, Srinivasu Pothukanuri<sup>4</sup>, Manuela Benvenuti<sup>6</sup>, Cecilia Pozzi<sup>6</sup>, Stefano Mangani<sup>6</sup>, Filomena De Luca<sup>7</sup>, Giulia Cerboni<sup>7</sup>, Jean-Denis Docquier<sup>7</sup> and David T. Davies<sup>1\*</sup>

22 Pages; 2 Figures; 3 Tables

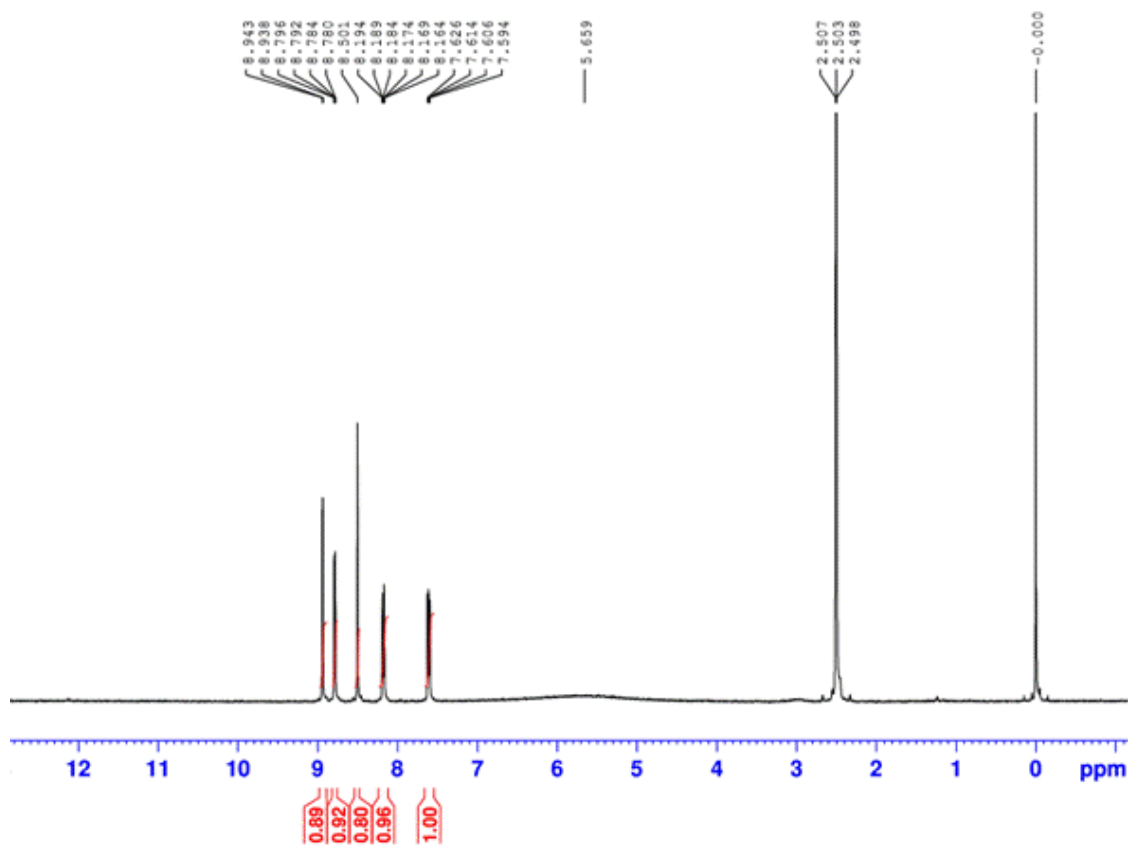

**Figure S1**  $^1\text{H}$  NMR spectrum of 5-(pyridine-3-sulfonamido)-1,3-thiazole-4-carboxylic acid (76), (ANT431)

### 3-[2-(2,6-Dichlorophenyl)acetamido]pyridine-2-carboxylic acid (22)

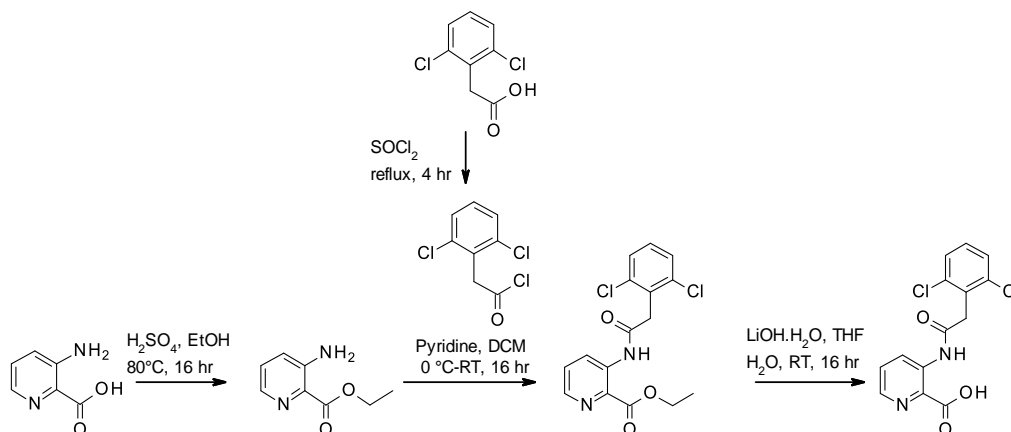

**Figure S2**

#### (a) Ethyl 3-aminopyridine-2-carboxylate

This preparation is based on the procedure of Carpino, L.A. *et al.*, (Journal of Organic Chemistry, 2004, **69**, 54-61) but the compound is also commercially available. A solution of 3-aminopyridine-2-carboxylic acid (5 g, 36.2 mmol) in ethanol (25 mL) was treated dropwise with sulfuric acid (5.8 mL, 108.6 mmol) at  $0^\circ\text{C}$ . The resulting reaction mixture was stirred at  $80^\circ\text{C}$  for 16 hours then the solvent evaporated under reduced pressure. The crude material was dissolved in ethyl acetate (100 mL), washed with aqueous  $\text{NaHCO}_3$  solution (60 mL), water and brine solution. The organic layer was dried over  $\text{Na}_2\text{SO}_4$ , filtered and concentrated to give crude compound which was triturated with n-pentane affording a light brown solid (2.6g, 43%).

$^1\text{H}$  NMR (400 MHz,  $\text{CDCl}_3$ ):  $\delta$  8.10 (1H, dd), 7.20 (1H, dd), 7.00 (1H, dd), 5.80 (2H, s), 4.40 (2H, q), 1.40 (3H, t).

**(b) 3-[2-(2,6-Dichlorophenyl)acetamido]pyridine-2-carboxylic acid**

A solution 2-(2,6-dichlorophenyl)acetic acid (185 mg, 0.90 mmol) in  $\text{SOCl}_2$  (3 mL) was heated to reflux for 4 hours under a nitrogen atmosphere. The reaction mixture was concentrated under reduced pressure. The crude 2-(2,6-dichlorophenyl)acetyl chloride was azeotroped with toluene to remove any traces of thionyl chloride affording an oil (0.2g). This acid chloride formation is based on the procedure of Ruechardt, C. et al., (Chem. Ber., 1975, **108**, 2448-2464).

A solution ethyl 3-aminopyridine-2-carboxylate (150 mg, 0.90 mmol) in dichloromethane was treated with pyridine (0.4 mL, 4.5 mmol) a under a nitrogen atmosphere. Then 2-(2,6-dichlorophenyl)acetyl chloride (0.2g, 0.90 mmol) was added to the reaction mixture at 0 °C. The resulting reaction mixture was stirred at room temperature for 16 hours then evaporated under reduced pressure. The residue was dissolved in 10% methanol/DCM (10 mL) and washed with saturated sodium bicarbonate solution (10 mL), water (10 mL) and brine solution (6 mL). The organic layer was dried over  $\text{Na}_2\text{SO}_4$ , filtered and concentrated to give a pale brown solid (320 mg, spectroscopic data consistent with ethyl 3-[2-(2,6-dichlorophenyl)acetamido]pyridine-2-carboxylate). This was dissolved in THF/ water (3:1, 4 mL) and treated with  $\text{LiOH}\cdot\text{H}_2\text{O}$  (56.9 mg, 1.35 mmol). The resulting mixture was stirred for 16 hours then concentrated under reduced pressure. The crude product was dissolved in water (4 mL) and acidified with 1N HCl to pH ~ 4.0. The precipitated solid was filtered and washed with diethyl ether (2 x 5 mL) and dried under high vacuum affording a white solid (50 mg, 17% over 2 steps).

$^1\text{H}$  NMR (400 MHz,  $\text{DMSO-}d_6$ ):  $\delta$  11.47 (br s, 1 H), 8.85 (dd,  $J = 8.4$  Hz,  $J = 0.8$  Hz, 1 H), 8.37 (d,  $J = 4.4$  Hz, 1 H), 8.67 (dd,  $J = 8.4$  Hz,  $J = 4.4$  Hz, 1 H), 7.56-7.52 (m, 2 H), 7.42-7.37 (m, 1 H), 4.13 (s, 2 H);  $^{13}\text{C}$  NMR (100 MHz,  $\text{DMSO-}d_6$ ):  $\delta$  167.5, 167.3, 142.2, 137.3, 135.6, 134.2, 130.8, 130.0, 129.1, 128.4, 127.9, 40.1-38.8 (obscured) ppm.

$m/z$ : 325  $[\text{M}+\text{H}]^+$ .

HRESIMS (High-resolution electrospray ionisation mass spectrometry):  $m/z$  325.0146  $[\text{M}+\text{H}]^+$  (325.0147 calculated for  $\text{C}_{14}\text{H}_{11}\text{Cl}_2\text{N}_2\text{O}_3$ )

### 3-(Phenylmethanesulfonamido)pyridine-2-carboxylic acid (63)

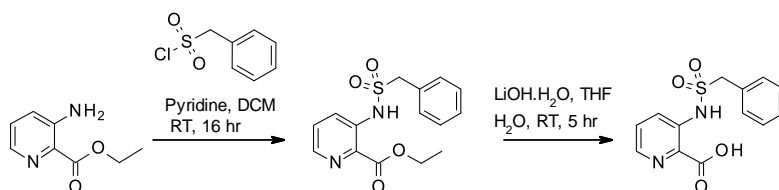

#### (a) Ethyl 3-(phenylmethanesulfonamido)pyridine-2-carboxylate

To a stirred solution of ethyl 3-aminopyridine-2-carboxylate (1 g, 6.0 mmol) in dichloromethane (10 mL) was added pyridine (2.4 mL, 30.0 mmol). After 10 min, benzenesulfonyl chloride (2.8 g, 15.0 mmol) was added. The mixture was stirred for 16 hours then diluted with DCM (20 mL) and washed with water (2 x 20 mL). The organic layer was dried over  $\text{Na}_2\text{SO}_4$ , filtered and concentrated to give a solid. This was purified by column chromatography using 25% ethyl acetate in petroleum ether as the eluent affording an off-white solid (850 mg, 44%).

$m/z$ : 321  $[\text{M}+\text{H}]^+$ .

$^1\text{H}$  NMR (400 MHz,  $\text{CDCl}_3$ ):  $\delta$  8.40 (dd, 1 H), 7.85 (dd, 1 H), 7.20-7.40 (m, 6 H), 4.40 (m, 4 H), 1.30 (t, 3H).

(b) **3-(Phenylmethanesulfonamido)pyridine-2-carboxylic acid**

To a stirred solution of ethyl 3-(phenylmethanesulfonamido)pyridine-2-carboxylate (850 mg, 2.65 mmol) in THF: water (1:1, 10 mL) was added LiOH.H<sub>2</sub>O (555 mg, 13.2 mmol). The resulting reaction mixture was stirred for 5 hours then the mixture was evaporated under reduced pressure and water (5 mL) was added to the residue. The aqueous solution was washed with Et<sub>2</sub>O (2 x 5 mL) and then acidified to pH 4.0 using 1N HCl. The resulting precipitate was filtered, washed with diethyl ether (2 x 5 mL) and dried under high vacuum affording an off-white solid (420 mg, 54%).

*m/z*: 291.0 [M-H]<sup>-</sup>

<sup>1</sup>H NMR (500 MHz, DMSO-*d*<sub>6</sub>): δ 11.34 (br s, 1 H), 8.33 (dd, *J* = 9.5 Hz, 1.5 Hz, 1 H), 7.89 (dd, *J* = 8.5 Hz, 1.0 Hz, 1 H), 7.59 (dd, *J* = 8.5 Hz, 4.5 Hz, 1 H), 7.32-7.27 (m, 5 H), 4.77 (s, 2 H).

**[3,4'-Bipyridine]-2-carboxylic acid (12)**

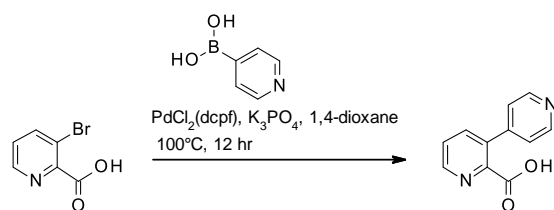

A solution of 3-bromopyridine-2-carboxylic acid (100 mg, 0.49 mmol) in 1,4-dioxane (4 mL) was purged with argon for 10 minutes. Then (pyridin-4-yl)boronic acid (73 mg, 0.59 mmol), K<sub>3</sub>PO<sub>4</sub> (315 mg, 1.48 mmol) and [1,1'-bis(di-cyclohexylphosphino) ferrocene] dichloropalladium (II) (18 mg, 0.02 mmol) were added under an argon atmosphere. The resulting reaction mixture was heated to 100°C for 12 hours then allowed to cool to room

temperature, filtered through a celite pad washing with with 10% methanol in dichloromethane. The combined extracts were concentrated under reduced pressure to get a brown solid. This was purified using a mass-directed auto purification system on an Agilent 1260 infinity machine with an XSelect CHS Prep C18 column, eluting with 0.1% formic acid in water/acetonitrile (detection with a Quadrupole LC/MS) affording the title compound as an off-white solid (100 mg, 27%).

$m/z$ : 201.0 [M+H]<sup>+</sup>

<sup>1</sup>H NMR (400 MHz, DMSO-*d*<sub>6</sub>): δ 13.59 (br s, 1 H), 9.20 (d,  $J = 1.6$  Hz, 1 H), 8.75 (d,  $J = 4.8$  Hz, 2 H), 8.41 (dd,  $J = 8.0$  Hz,  $J = 1.6$  Hz, 1 H), 8.26 (d,  $J = 8.0$  Hz, 1 H), 8.12 (d,  $J = 4.8$  Hz, 2 H).

### 5-(Phenylsulfonamido)-1,3-thiazole-4-carboxylic acid (62)

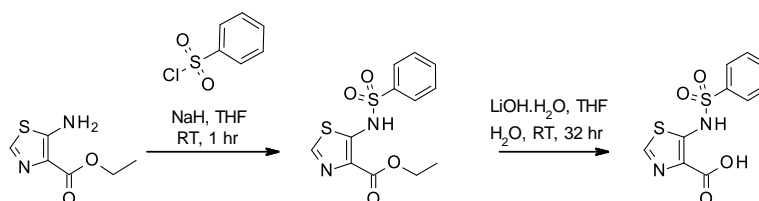

#### (a) Ethyl 5-(phenylsulfonamido)-1,3-thiazole-4-carboxylate

To a stirred suspension of NaH (348 mg, 8.71 mmol) in THF (5 mL) was added ethyl 5-amino-1,3-thiazole-4-carboxylate (500 mg, 2.90 mmol) in THF (5 mL) at 0 °C. The reaction mixture was stirred at 0 °C for 30 min. Then, phenylsulfonyl chloride (615 mg, 3.48 mmol) in THF (5 mL) was added dropwise to the reaction mixture. The resulting reaction mixture was stirred for 1 hour then quenched with saturated NH<sub>4</sub>Cl solution (10 mL) and extracted with EtOAc (2x15 mL). The combined organic layer was dried over anhydrous Na<sub>2</sub>SO<sub>4</sub>, filtered and concentrated

to afford crude product. This was purified by Combi-flash column chromatography (12 g silica cartridge) using 30% EtOAc/ pet ether as an eluent to afford ethyl 5-(phenylsulfonamido)-1,3-thiazole-4-carboxylate as a yellow solid (240 mg, 26%).

$^1\text{H NMR}$  (400 MHz,  $\text{CDCl}_3$ ):  $\delta$  10.15 (1H, bs), 8.25 (1H, s), 7.90 (2H, m), 7.60 (1H, m), 7.50 (2H, d), 4.40 (2H, q), 1.40 (3H, t).

$m/z$ : 313.1  $[\text{M}+\text{H}]^+$

(b) **5-(Phenylsulfonamido)-1,3-thiazole-4-carboxylic acid**

To a stirred solution of ethyl 5-(phenylsulfonamido)-1,3-thiazole-4-carboxylate (240 mg, 0.76 mmol) in THF (3 mL): water (1 mL) was added  $\text{LiOH}\cdot\text{H}_2\text{O}$  (322 mg, 7.68 mmol). The resulting reaction mixture was stirred for 32 hours. then concentrated under reduced pressure. The residue was dissolved in water (4 mL) and washed with diethyl ether (2x3 mL). The aqueous phase was acidified with 1N HCl to pH  $\sim$ 4.0. The resulting precipitate was filtered, washed with diethyl ether (2x3 mL) and dried under high vacuum affording the title compound as a white solid (81 mg, 37%).

$m/z$ : 285.2  $[\text{M}+\text{H}]^+$

$^1\text{H NMR}$  ( $\text{DMSO}-d_6$ , 400 MHz)  $\delta$ : 8.55 (s, 1 H), 7.83 (dd,  $J = 7.2$  Hz,  $J = 0.8$  Hz, 2 H), 7.70-7.65 (m, 1 H), 7.58 (dd,  $J = 8.0$  Hz,  $J = 7.2$  Hz, 2 H) .5-(Pyridine-4-sulfonamido)-1,3-thiazole-4-carboxylic acid (77)

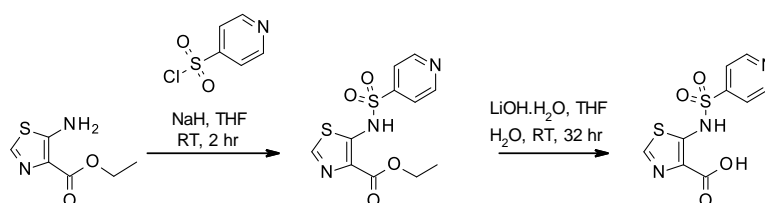



To a stirred suspension of NaH (693 mg, 29.0 mmol) in THF (5 mL) was added ethyl 5-amino-1,3-thiazole-4-carboxylate (1 g, 5.80 mmol) in THF (10 mL) at 0 °C. The reaction mixture was stirred at 0 °C for 30 min. Then, pyridine-4-sulfonyl chloride (2.06 g, 11.6 mmol) in THF (5mL) was added drop wise. The resulting mixture was stirred for 2 hours at room temperature then quenched with 1 N citric acid solution at 0 °C and extracted with EtOAc (2x50 mL). The combined organic layers were dried over anhydrous Na<sub>2</sub>SO<sub>4</sub>, filtered and concentrated to a solid. The crude product was purified by silica gel column chromatography eluting with 70% EtOAc/ petroleum ether an off-white solid (500 mg, 28%), LCMS analysis of which showed an approximate 2:1 mixture of ethyl 5-(pyridine-4-sulfonamido)-1,3-thiazole-4-carboxylate: ethyl 5-amino-1,3-thiazole-4-carboxylate. This material was dissolved in THF (15 mL): water (15 mL) and treated with LiOH.H<sub>2</sub>O (321 mg, 7.65 mmol). The resulting reaction mixture was stirred for 16 hours then concentrated under reduced pressure. The residue was dissolved in water and acidified to pH ~4.0 with 1N HCl. The precipitated solid was filtered and dried under high vacuum (260 mg). This was purified by preparative HPLC affording the title compound as a yellow solid (33 mg).

*m/z*: 285.9 [M+H]<sup>+</sup>

<sup>1</sup>H NMR (DMSO-*d*<sub>6</sub>, 500 MHz) δ: 8.76 (dd, *J* = 4.5 Hz, *J* = 1.5 Hz, 2 H), 8.28 (s, 1 H), 7.69 (dd, *J* = 4.5 Hz, *J* = 1.5 Hz, 2 H).

### 5-(Pyridine-2-sulfonamido)-1,3-thiazole-4-carboxylic acid (75)

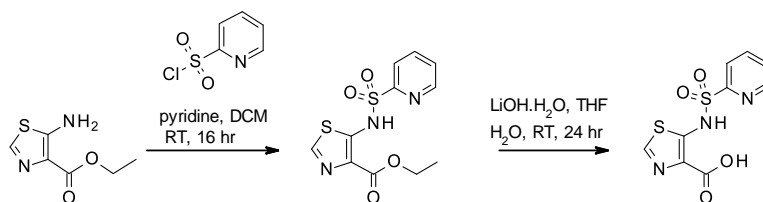

To a stirred solution of ethyl 5-amino-1,3-thiazole-4-carboxylate (150 mg, 0.87 mmol) in DCM (5 mL) under N<sub>2</sub> atmosphere was added pyridine (0.2 mL, 2.61 mmol). After 10 minutes, pyridine-2-sulfonyl chloride (185 mg, 1.04 mmol) was added at. The resulting reaction mixture was stirred for 16 hours then was diluted with DCM (20 mL), washed with water (15 mL) and 1N HCl solution (10 mL). The organic layer was dried over anhydrous Na<sub>2</sub>SO<sub>4</sub>, filtered and concentrated to obtain a brown solid (65 mg). This was dissolved in THF: H<sub>2</sub>O (3:1 mL) and treated with LiOH.H<sub>2</sub>O (24 mg, 0.57 mmol). The resulting reaction mixture was stirred for 24 hours then concentrated under reduced pressure. The crude residue was partitioned between water (5 mL) and EtOAc (5 mL). The aqueous layer was acidified with 1N HCl solution to pH ~4. The resulting precipitate was filtered, washed with diethyl ether (2x3 mL) and dried under high vacuum affording a pale yellow solid (19 mg, 34%).

*m/z*: 283.9 [M-H]<sup>-</sup>

<sup>1</sup>H NMR (300 MHz, DMSO-*d*<sub>6</sub>): δ 8.67 (dd, *J* = 4.8 Hz, *J* = 0.9 Hz, 1 H), 8.49 (s, 1 H), 8.06 (dt, *J* = 7.8 Hz, *J* = 1.5 Hz, 1 H), 7.98 (dd, *J* = 7.8 Hz, *J* = 0.9 Hz, 1 H), 7.67-7.63 (m, 1 H).

| Compound number | Structure                                                                           | IC <sub>50</sub> NDM-1/μM;<br>(MIC vs NTBC121*) | IC <sub>50</sub> VIM-1/μM;<br>(MIC vs NTBC055**) | IC <sub>50</sub> IMP-1/μM<br>(MIC vs NTBC062***) |
|-----------------|-------------------------------------------------------------------------------------|-------------------------------------------------|--------------------------------------------------|--------------------------------------------------|
| 1               | 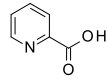   | 17.1                                            | > 200                                            | > 200                                            |
| 7               |    | 40.9                                            | > 200                                            | > 200                                            |
| 8               |    | > 200                                           | > 200                                            | > 200                                            |
| 9               |    | > 200                                           | > 200                                            | > 200                                            |
| 10              |   | > 200                                           | > 200                                            | > 200                                            |
| 11              |  | 19.4                                            | > 200                                            | > 200                                            |
| 12              |  | > 200                                           | > 200                                            | > 200                                            |
| 13              |  | > 200                                           | > 200                                            | > 200                                            |
| 14              |  | > 200                                           | > 200                                            | > 200                                            |
| 15              |  | 162.6                                           | > 200                                            | > 200                                            |
| 16              |  | > 200                                           | > 200                                            | > 200                                            |

|    |                                                                                     |       |       |       |
|----|-------------------------------------------------------------------------------------|-------|-------|-------|
| 17 | 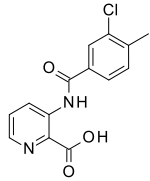   | 8.46  | 95.7  | 87.6  |
| 18 |    | > 200 | > 200 | > 200 |
| 19 |    | 20.3  | > 200 | 34.1  |
| 20 |   | 11.1  | > 200 | 156.6 |
| 21 |  | 8.99  | > 200 | > 200 |
| 22 |  | 21.1  | > 200 | > 200 |
| 23 |  | 6.56  | 133   | 146   |
| 24 |  | 20.3  | > 200 | 156   |
| 25 |  | 55.9  | > 200 | > 200 |
| 26 |  | 19.4  | > 200 | > 200 |

|    |                                                                                     |           |           |           |
|----|-------------------------------------------------------------------------------------|-----------|-----------|-----------|
| 27 | 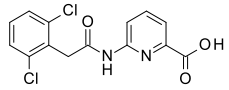   | > 200     | > 200     | 80        |
| 28 |    | 3.56      | > 200     | 82.2      |
| 29 |    | > 200     | > 200     | > 200     |
| 30 |    | 69.9      | > 200     | > 200     |
| 31 |    | 68.8      | > 200     | > 200     |
| 32 |  | 49.9 (16) | > 200 (4) | > 200 (2) |
| 33 |  | 147.5     | > 200     | > 200     |
| 34 |  | > 200     | > 200     | > 200     |
| 35 |  | 52.1      | > 200     | > 200     |
| 37 |  | 25.2      | > 200     | 195.5     |

|    |                                                                                     |            |            |           |
|----|-------------------------------------------------------------------------------------|------------|------------|-----------|
| 36 | 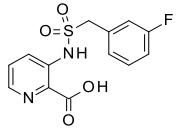   | > 200      | 107.9      | 151.7     |
| 37 |    | 116.5 (32) | > 200 (2)  | 150.1 (1) |
| 39 |    | 32.6 (16)  | 10.9 (0.5) | 20.9 (1)  |
| 40 |    | 17.9 (16)  | 71.6 (2)   | > 200 (1) |
| 41 |   | 80.6 (16)  | 17.5 (1)   | 74.3 (1)  |
| 42 |  | 18.4       | 88.4       | 146.3     |
| 43 |  | 18.6 (8)   | 57.2 (1)   | 180 (1)   |
| 44 |  | 119.5      | > 200      | > 200     |
| 45 |  | 43.3       | > 200      | > 200     |
| 46 |  | 43.7       | > 200      | > 200     |

|    |                                                                                     |       |       |       |
|----|-------------------------------------------------------------------------------------|-------|-------|-------|
| 47 | 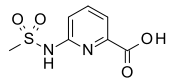   | 32.8  | > 200 | > 200 |
| 48 |    | > 200 | > 200 | > 200 |
| 49 |    | > 200 | > 200 | > 200 |
| 50 |    | 35.3  | > 200 | > 200 |
| 51 |   | 11.5  | > 200 | > 200 |
| 52 |  | 11.6  | > 200 | > 200 |
| 53 |  | 43    | > 200 | > 200 |
| 54 |  | 65    | > 200 | > 200 |
| 55 |  | 145.4 | > 200 | > 200 |

|    |                                                                                    |      |       |       |
|----|------------------------------------------------------------------------------------|------|-------|-------|
| 56 | 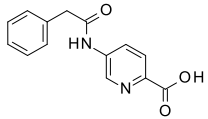  | 21.4 | > 200 | > 200 |
| 57 |   | 27.9 | > 200 | > 200 |
| 58 |   | 3.99 | > 200 | > 200 |
| 59 |   | 2.17 | 109.1 | 113.8 |
| 60 |  | 7.2  | > 200 | 162.4 |

**Table S1. Array of pyridine-2-carboxylate analogues**

\* NDM-1 producing strain; E. coli NTBC121; MIC meropenem 32 ug/mL (no inhibitor)

\*\* VIM-1 producing strain; K. pneumo NTBC055; MIC meropenem 16 ug/mL (no inhibitor)

\*\*\* IMP-1 producing strain; K. pneumo NTBC062; MIC meropenem 4 ug/mL (no inhibitor)

The inhibitor was present at 100  $\mu$ M concentration, the meropenem MICs are reported in ug/mL.



| Enzyme tested /<br>ANT431 | IC50 ( $\mu$ M) | SD ( $\mu$ M) | N test |
|---------------------------|-----------------|---------------|--------|
| NDM-1                     | 2.67            | 0.24          | 3      |
| VIM-1                     | >200            | ND            | 2      |
| VIM-2                     | 6.7             | 1.8           | 4      |
| IMP-1                     | 54              | 8.2           | 4      |

**Table S2 Enzyme inhibition data for ANT431**

### **X-ray crystallography**

The purified VIM-2 enzyme (4.5 mg/ml) was crystallized in 24-well sitting-drop plates (Cryschem plate; Hampton Research) using 0.1 M cacodilate (pH 6.5), 5 mM DTT, 0.2 M Na-acetate, 26% PEG 8000 as the precipitant solution (drop volume, 4  $\mu$ l; reservoir volume 800  $\mu$ l).<sup>1,2</sup> Crystals of VIM-2 were subsequently soaked for 30 to 60 min with solutions of test compounds (inhibitors were resuspended in a DMSO/PEG-800 mixture, 1:9 vol/vol; final inhibitor concentration in the drop, 0.5 to 2 mM) prior to flash freezing in liquid nitrogen. Diffraction data were collected at both the European Synchrotron Radiation Facility (ESRF, Grenoble, France) and at the Diamond Light Source (Didcot, UK). Data were processed using MOSFLM<sup>3</sup> and scaled with SCALA<sup>4</sup> or AIMLESS from the CCP4 suite<sup>5</sup>. The structure of the VIM-2 complexes was obtained by molecular replacement using the program MOLREP<sup>6</sup> and PDB entry 1KO3<sup>2</sup> (waters omitted) as the search model. Isotropic refinement of the structures was carried out with the program REFMAC5<sup>7</sup> from the CCP4 suite. In between refinement cycles, the model was subjected to manual rebuilding using Coot<sup>8</sup>. Water molecules were added using the standard procedure within the ARP/wARP suite<sup>9</sup>. The stereochemical quality of the

refined model was assessed using the program PROCHECK<sup>10</sup> and Coot. The ligand placement was checked in the final models through the calculation of the omit maps and validated during the deposition in the protein data bank. Figures were prepared using the PyMOL software (<http://www.pymol.org>). Data collection, data reduction and structure refinement statistics are reported in Table S11.

**TABLE S3. Data collection, refinement and ligand validation statistics.**

| Parameter                                               | VIM-2:32                        | VIM-2:62                        | VIM-2:76                        |
|---------------------------------------------------------|---------------------------------|---------------------------------|---------------------------------|
| X-ray source                                            | DLS I04                         | DLS I04                         | DLS I04-1                       |
| Wavelength (Å)                                          | 0.97949                         | 0.97949                         | 0.91587                         |
| Data collection temp (K)                                | 100                             | 100                             | 100                             |
| Space group                                             | I222                            | I222                            | I222                            |
| Cell dimensions (Å)                                     | a = 67.91, b = 77.90, c = 79.45 | a = 67.65, b = 78.38, c = 78.82 | a = 67.29, b = 77.69, c = 79.32 |
| subunits/asymmetric unit                                | 1                               | 1                               | 1                               |
| Matthews coefficient (Å <sup>3</sup> Da <sup>-1</sup> ) | 2.06                            | 2.06                            | 2.10                            |
| Solvent content (%)                                     | 40.30                           | 39.96                           | 41.44                           |
| Resolution limits (Å) <sup>a</sup>                      | 55.62 – 2.00 (2.08 – 2.00)      | 31.23 – 1.75 (1.78 – 1.75)      | 51.32 – 1.80 (1.90 – 1.80)      |
| No. of reflections measured <sup>a</sup>                | 91,927 (7,464)                  | 140,931 (6,974)                 | 144,351 (21,129)                |
| No. of unique reflections <sup>a</sup>                  | 14,585 (1,175)                  | 21,376 (1,160)                  | 19,621 (2,800)                  |
| Completeness (%) <sup>a</sup>                           | 100.0 (100.0)                   | 99.6 (99.7)                     | 100.0 (100.0)                   |
| R <sub>merge</sub> (%) <sup>a,b</sup>                   | 11.7 (64.7)                     | 13.9 (67.0)                     | 5.8 (45.1)                      |
| Multiplicity <sup>a</sup>                               | 6.3 (6.4)                       | 6.6 (6.0)                       | 7.4 (7.5)                       |

|                                       |           |           |            |
|---------------------------------------|-----------|-----------|------------|
| $I/\sigma(I)^a$                       | 9.8 (2.8) | 7.5 (1.8) | 16.2 (3.4) |
| Wilson B factor ( $\text{\AA}^2$ )    | 16.985    | 16.280    | 24.600     |
| $R_{\text{cryst}}$ (%) <sup>a,b</sup> | 18.1      | 20.0      | 18.9       |
| $R_{\text{free}}$ (%) <sup>a,b</sup>  | 22.7      | 25.0      | 23.4       |
| Protein atoms                         | 1768      | 1761      | 1731       |
| Ligand atoms                          | 19        | 18        | 18         |
| Water molecules                       | 76        | 118       | 114        |
| Avg B factor ( $\text{\AA}^2$ )       | 25.38     | 23.99     | 33.08      |
| RMSD bond length ( $\text{\AA}$ )     | 0.019     | 0.018     | 0.020      |
| RMSD bond angle ( $^\circ$ )          | 1.987     | 2.042     | 1.952      |

<sup>a</sup>Data in parentheses refer to results for the highest-resolution shell.

<sup>b</sup> $R_{\text{merge}} = \sum_h \sum_i |I_{i,h} - \bar{I}_h| / \sum_h \sum_i I_{i,h} \times 100$ .  $R_{\text{cryst}}(R_{\text{free}}) = \sum_b | |F_{b,\text{obs}}| - |F_{b,\text{calc}}| | / \sum_b | |F_{b,\text{obs}}| \times 100$ .

- (1) Benvenuti, M., Mangani, S. (2007) Crystallization of soluble proteins in vapor diffusion for X-ray crystallography. *Nat. Protoc.* 2, 1633–1651.
- (2) Garcia-Saez, I., Docquier, J.D., Rossolini, G.M. & Dideberg O. (2008) The three-dimensional structure of VIM-2, a Zn- $\beta$ -lactamase from *Pseudomonas aeruginosa* in its reduced and oxidised form. *J. Mol. Biol.* 375, 604-611.
- (3) Battye, T.G., Kontogiannis, L., Johnson, O., Powell, H.R., Leslie, A.G. (2011) iMOSFLM: a new graphical interface for diffraction-image processing with MOSFLM. *Acta Crystallogr. D Biol. Crystallogr.* 67, 271–281.
- (4) Evans, P.R. (2006) Scaling and assessment of data quality. *Acta Crystallogr. D Biol. Crystallogr.* 62, 72–82.
- (5) Winn, M.D., *et al.* (2011) Overview of the CCP4 suite and current developments. *Acta Crystallogr. D Biol. Crystallogr.* 67, 235–242.
- (6) Vagin, A., Teplyakov, A. (1997) MOLREP: an automated program for molecular replacement. *J. Appl. Crystallogr.* 30, 1022–1025.
- (7) Murshudov, G.N., *et al.* REFMAC5 for the refinement of macromolecular crystal structures. (2011) *Acta Crystallogr D Biol Crystallogr.* 67, 355–367.
- (8) Emsley, P., Lohkamp, B., Scott, W.G., Cowtan, K. Features and development of Coot. (2011) *Acta Crystallogr. D Biol. Crystallogr.* 66, 486–501.
- (9) Langer, G., Cohen, S.X., Lamzin, V.S., Perrakis, A. (2008) Automated macromolecular model building for X-ray crystallography using ARP/wARP version 7. *Nat. Protoc.* 3, 1171–1179.
- (10) Laskowski, R.A., MacArthur, M.W., Moss, D.S., Thornton, J.M. (1993) PROCHECK: a program to check the stereochemical quality of protein structures. *J. Appl. Crystallogr.* 26, 283–291.
